# Supplementary material for: Genetic variants of genes in the Notch signaling pathway predict overall survival of non-small cell lung cancer patients in the PLCO study
Source: PubMed Central journal article supplement (PMC5308685; doi:10.18632/oncotarget.11436), 2016-08-20
Supplement: oncotarget-07-61716-s001.pdf [file oncotarget-07-61716-s001.pdf]

# Genetic variants of genes in the Notch signaling pathway predict overall survival of non-small cell lung cancer patients in the PLCO study

## Supplementary Materials

### SUPPLEMENTARY ACKNOWLEDGMENTS

We wish to thank all of the investigators and funding agencies that enabled the deposition of data in dbGaP and PLCO that we used in this study:

The datasets used for the analyses described in this manuscript were obtained from dbGaP at <http://www.ncbi.nlm.nih.gov/gap> through dbGaP accession number phs000336.v1.p1 and phs000093.v2.p2. Principal Investigators: Maria Teresa Landi. Genetic Epidemiology Branch, Division of Cancer Epidemiology and Genetics, National Cancer Institute, National Institutes of Health, Bethesda, MD, USA. Neil E. Caporaso. Genetic Epidemiology Branch, Division of Cancer Epidemiology and Genetics, National Cancer Institute, National Institutes of Health, Bethesda, MD, USA.

Funding support for the GWAS of Lung Cancer and Smoking was provided through the NIH Genes, Environment and Health Initiative [GEI] (Z01 CP 010200). The human subjects participating in the GWAS derive from The Environment and Genetics in Lung Cancer Etiology (EAGLE) case-control study and the

Prostate, Lung Colon and Ovary Screening Trial and these studies are supported by intramural resources of the National Cancer Institute. Assistance with phenotype harmonization and genotype cleaning, as well as with general study coordination, was provided by the Gene Environment Association Studies, GENEVA Coordinating Center (U01HG004446). Assistance with data cleaning was provided by the National Center for Biotechnology Information. Funding support for genotyping, which was performed at the Johns Hopkins University Center for Inherited Disease Research, was provided by the NIH GEI (U01HG004438).

PLCO was also supported by the Intramural Research Program of the Division of Cancer Epidemiology and Genetics and by contracts from the Division of Cancer Prevention, National Cancer Institute, NIH, DHHS. The authors thank PLCO screening center investigators and staff, and the staff of Information Management Services Inc. and Westat Inc. Most importantly, we acknowledge trial participants for their contributions that made this study possible.

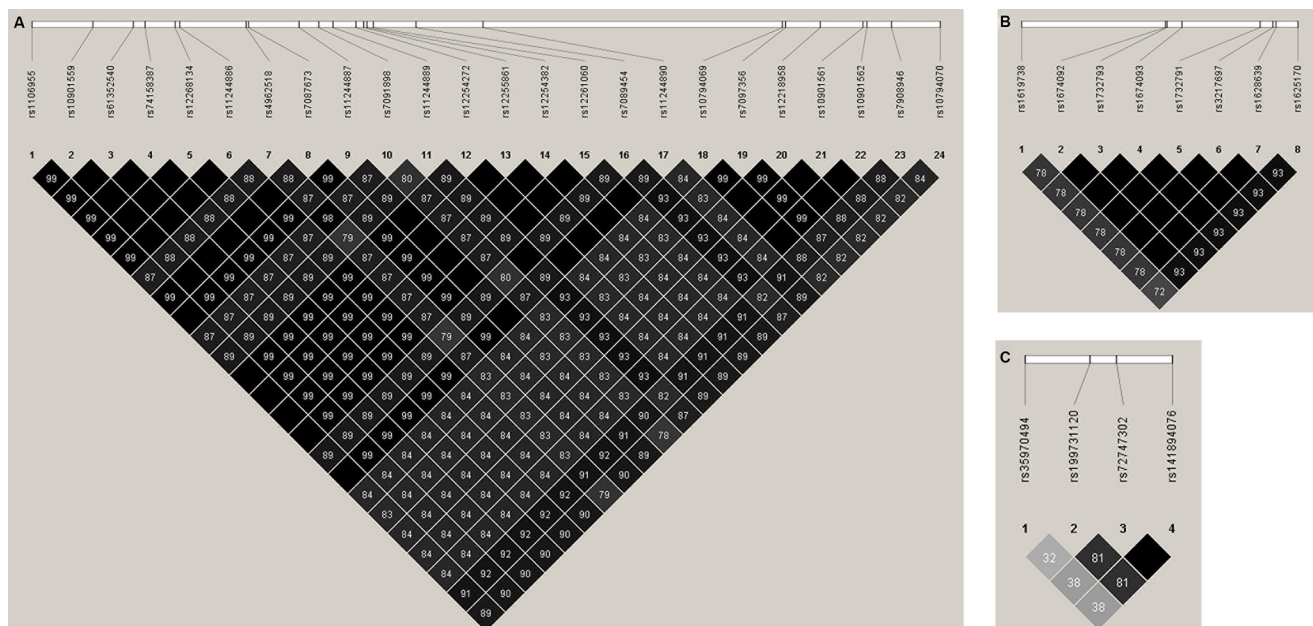

**Supplementary Figure S1: Linkage disequilibrium (LD) plots for SNPs in the same gene. (A) the 24 SNPs in *ADAM12*; (B) the 8 SNPs in *DTX1*; (C) the 4 SNPs in *TLE1*.**

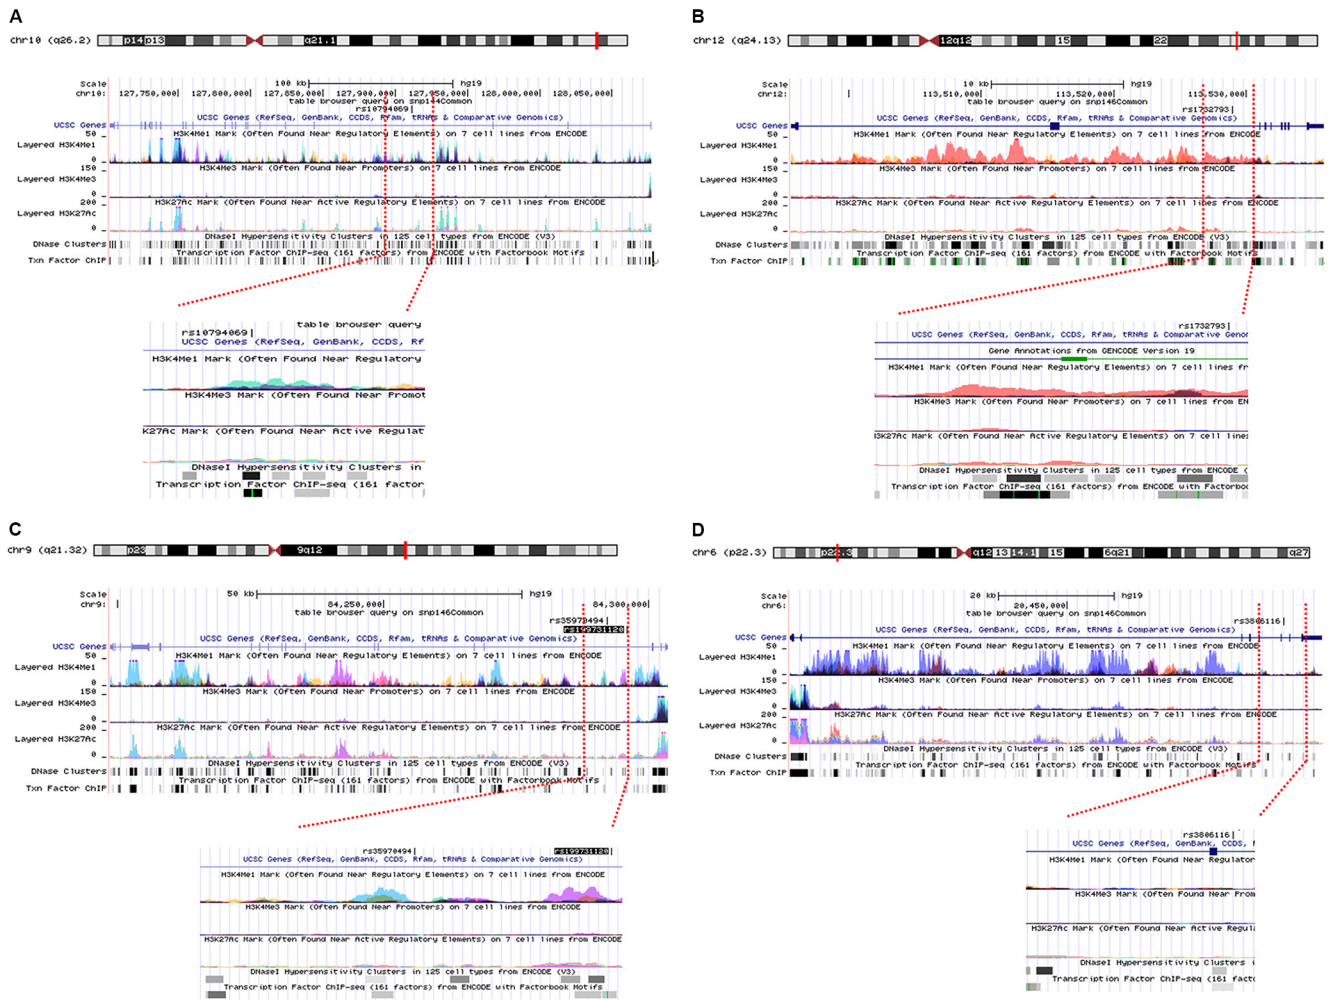

Supplementary Figure S2: ENCODE project data of tagSNPs from the University of California Santa Cruz (UCSC, <http://genome.ucsc.edu/>).

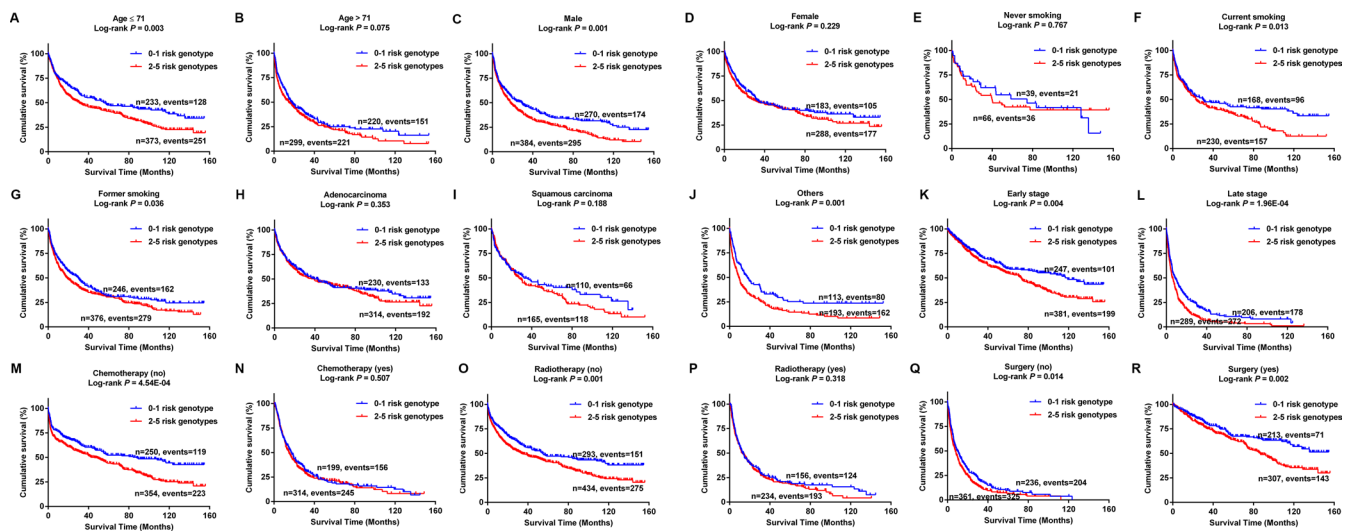

Supplementary Figure S3: Kaplan-Meier survival curves for NSCLC patients with 0-1 and 2-5 risk genotypes stratified by clinicopathological characteristics: age (A and B); sex (C and D); smoking status (E, F and G); histology (H, I and J); tumor stage (K and L); chemotherapy (M and N); radiotherapy (O and P) and surgery (Q and R).

**Supplementary Table S1: Associations of demographics and clinical characteristics with OS in NSCLC patients from the PLCO study<sup>a</sup>**

| Characteristics         | No.                     |            | Median Survival Time <sup>b</sup> | Univariate Analysis |                  | Multivariate Analysis <sup>c</sup> |                  |          |
|-------------------------|-------------------------|------------|-----------------------------------|---------------------|------------------|------------------------------------|------------------|----------|
|                         | Patients                | Deaths (%) |                                   | HR (95%)            | P                | HR (95%)                           | P                |          |
| Total                   | 1185                    | 798 (67.3) | 23.77                             |                     |                  |                                    |                  |          |
| Age <sup>d</sup>        | ≤ 71                    | 636        | 400 (62.9)                        | 36.53               | 1.00             | 1.00                               |                  |          |
|                         | > 71                    | 549        | 398 (72.5)                        | 14.60               | 1.74 (1.51–2.00) | < 0.0001                           | 1.26 (1.09–1.46) | 0.002    |
| Sex                     | Male                    | 698        | 507 (72.6)                        | 19.33               | 1.00             | 1.00                               |                  |          |
|                         | Female                  | 487        | 291 (59.8)                        | 31.77               | 0.73 (0.63–0.84) | < 0.0001                           | 0.80 (0.69–0.94) | 0.005    |
| Smoking status          | Never                   | 115        | 63 (54.8)                         | 43.50               | 1.00             | 1.00                               |                  |          |
|                         | Current                 | 423        | 272 (64.3)                        | 23.70               | 1.34 (1.02–1.76) | 0.038                              | 1.79 (1.32–2.44) | 0.0002   |
| Pack years <sup>d</sup> | Former                  | 647        | 463 (71.6)                        | 21.30               | 1.51 (1.16–1.96) | 0.002                              | 1.69 (1.26–2.27) | 0.0005   |
|                         | ≤ 49                    | 603        | 399 (66.2)                        | 23.77               | 1.00             | 1.00                               |                  |          |
| Histology               | > 49                    | 581        | 398 (68.5)                        | 23.97               | 1.05 (0.92–1.21) | 0.458                              | 1.01 (0.87–1.17) | 0.936    |
|                         | Missing                 | 1          |                                   |                     |                  |                                    |                  |          |
| Stage                   | Adenocarcinoma          | 577        | 348 (60.3)                        | 36.37               | 1.00             | 1.00                               |                  |          |
|                         | Squamous cell carcinoma | 285        | 192 (67.4)                        | 29.83               | 1.19 (1.00–1.42) | 0.057                              | 1.14 (0.94–1.37) | 0.180    |
| Chemotherapy            | Others                  | 323        | 258 (79.9)                        | 10.87               | 1.89 (1.60–2.22) | < 0.0001                           | 1.33 (1.12–1.57) | 0.003    |
|                         | I–IIIA                  | 655        | 315 (48.1)                        | 80.13               | 1.00             | 1.00                               |                  |          |
| Radiotherapy            | IIIB–IV                 | 528        | 482 (91.3)                        | 6.87                | 5.08 (4.37–5.91) | < 0.0001                           | 2.70 (2.23–3.27) | < 0.0001 |
|                         | Missing                 | 2          |                                   |                     |                  |                                    |                  |          |
| Surgery                 | No                      | 639        | 367 (57.4)                        | 53.03               | 1.00             | 1.00                               |                  |          |
|                         | Yes                     | 538        | 423 (78.6)                        | 14.83               | 1.85 (1.60–2.14) | < 0.0001                           | 0.42 (0.35–0.50) | < 0.0001 |
| Surgery                 | Missing                 | 8          |                                   |                     |                  |                                    |                  |          |
|                         | No                      | 762        | 450 (59.1)                        | 40.50               | 1.00             | 1.00                               |                  |          |
| Surgery                 | Yes                     | 415        | 340 (81.9)                        | 12.33               | 1.94 (1.68–2.24) | < 0.0001                           | 0.90 (0.77–1.05) | 0.160    |
|                         | Missing                 | 8          |                                   |                     |                  |                                    |                  |          |
| Surgery                 | No                      | 637        | 566 (88.9)                        | 8.27                | 1.00             | 1.00                               |                  |          |
|                         | Yes                     | 540        | 224 (41.5)                        | 103.33              | 0.15 (0.13–0.18) | < 0.0001                           | 0.26 (0.21–0.33) | < 0.0001 |
| Surgery                 | Missing                 | 8          |                                   |                     |                  |                                    |                  |          |

Abbreviations: OS, overall survival; NSCLC, non-small cell lung cancer; PLCO, the Prostate, Lung, Colorectal and Ovarian Cancer Screening Trial; HR, hazards ratio.

<sup>a</sup>Reference: Yanru Wang, etc. Genetic variants in *ABCG1* predict survival of non-small cell lung cancer patients. *Int J Cancer*. 2016.

<sup>b</sup>Median survival time for overall survival.

<sup>c</sup>Multivariate Cox regression analyses were adjusted for all factors listed in this table.

<sup>d</sup>Median age is 71 years; Median pack year is 49.

**Supplementary Table S2: Databases for selection of the list of genes in the Notch signaling pathway**

| <b>Dataset</b>    | <b>Name of Pathway</b>       | <b>Genes</b> |
|-------------------|------------------------------|--------------|
| KEGG <sup>a</sup> | KEGG_NOTCH_SIGNALING_PATHWAY | 47           |
| GO <sup>b</sup>   | GO_NOTCH_SIGNALING_PATHWAY   | 12           |
| PID <sup>c</sup>  | PID_NOTCH_PATHWAY            | 59           |
| REACTOME          | REACTOME_SIGNALING_BY_NOTCH  | 103          |
| <b>TOTAL</b>      |                              | <b>139</b>   |

MSigDB database: <http://www.broadinstitute.org/gsea/msigdb/>.

Keyword: Notch.

Search Filters: Collection: Canonical pathways + GO gene sets; Organism: Homo sapiens. Contributor: All contributors.

<sup>a</sup>KEGG, Kyoto Encyclopedia of Genes and Genomes.

<sup>b</sup>GO, Gene Ontology.

<sup>c</sup>PID, Pathway Interaction Database.

**Supplementary Table S3: Summary of SNPs with positive eQTL results in 373 individuals of European descendants from 1000 Genomes Project**

| Gene          | SNP         | Chr. | Location | $P^a$    | eQTL <sup>b</sup> | Snpinfo <sup>c</sup> | RegulomeDB <sup>d</sup> |
|---------------|-------------|------|----------|----------|-------------------|----------------------|-------------------------|
| <i>ADAM12</i> | rs10794069  | 10   | intron   | 3.62E-05 | 0.003             | -                    | 4                       |
| <i>ADAM12</i> | rs10901559  | 10   | intron   | 7.31E-05 | 0.013             | -                    | 6                       |
| <i>ADAM12</i> | rs10901561  | 10   | intron   | 4.80E-05 | 0.003             | -                    | 5                       |
| <i>ADAM12</i> | rs10901562  | 10   | intron   | 4.44E-05 | 0.003             | -                    | 5                       |
| <i>ADAM12</i> | rs1106955   | 10   | intron   | 7.26E-05 | 0.014             | -                    | 5                       |
| <i>ADAM12</i> | rs11244886  | 10   | intron   | 7.72E-05 | 0.013             | -                    | 5                       |
| <i>ADAM12</i> | rs11244887  | 10   | intron   | 3.60E-05 | 0.014             | -                    | 5                       |
| <i>ADAM12</i> | rs11244890  | 10   | intron   | 3.85E-05 | 0.014             | -                    | 6                       |
| <i>ADAM12</i> | rs12218958  | 10   | intron   | 4.80E-05 | 0.003             | -                    | 4                       |
| <i>ADAM12</i> | rs12254272  | 10   | intron   | 1.28E-04 | 0.014             | -                    | -                       |
| <i>ADAM12</i> | rs12254382  | 10   | intron   | 1.28E-04 | 0.014             | -                    | -                       |
| <i>ADAM12</i> | rs12255861  | 10   | intron   | 1.28E-04 | 0.014             | -                    | -                       |
| <i>ADAM12</i> | rs12261060  | 10   | intron   | 1.28E-04 | 0.014             | -                    | -                       |
| <i>ADAM12</i> | rs12268134  | 10   | intron   | 3.15E-05 | 0.013             | -                    | 5                       |
| <i>ADAM12</i> | rs4962518   | 10   | intron   | 1.08E-04 | 0.037             | -                    | -                       |
| <i>ADAM12</i> | rs61352540  | 10   | intron   | 7.31E-05 | 0.013             | -                    | 6                       |
| <i>ADAM12</i> | rs7087673   | 10   | intron   | 3.19E-05 | 0.013             | -                    | 6                       |
| <i>ADAM12</i> | rs7091898   | 10   | intron   | 1.90E-04 | 0.036             | -                    | 3a                      |
| <i>ADAM12</i> | rs7097356   | 10   | intron   | 5.30E-05 | 0.004             | -                    | 4                       |
| <i>ADAM12</i> | rs74158387  | 10   | intron   | 3.15E-05 | 0.013             | -                    | -                       |
| <i>ADAM12</i> | rs7908946   | 10   | intron   | 2.87E-05 | 0.018             | -                    | 5                       |
| <i>ADAM12</i> | rs10794070  | 10   | intron   | 9.07E-05 | 0.009             | -                    | 5                       |
| <i>ADAM12</i> | rs11244889  | 10   | intron   | 1.60E-04 | 0.003             | -                    | -                       |
| <i>ADAM12</i> | rs7089454   | 10   | intron   | 1.15E-04 | 0.003             | -                    | 3a                      |
| <i>DTX1</i>   | rs1619738   | 12   | intron   | 2.28E-04 | 0.022             | TFBS                 | 4                       |
| <i>DTX1</i>   | rs1625170   | 12   | intron   | 8.04E-05 | 0.020             | -                    | 3a                      |
| <i>DTX1</i>   | rs1628639   | 12   | intron   | 8.82E-05 | 0.014             | -                    | 4                       |
| <i>DTX1</i>   | rs1674092   | 12   | intron   | 8.04E-05 | 0.014             | TFBS                 | 4                       |
| <i>DTX1</i>   | rs1674093   | 12   | intron   | 1.37E-04 | 0.014             | TFBS                 | 3a                      |
| <i>DTX1</i>   | rs1732791   | 12   | intron   | 8.04E-05 | 0.014             | -                    | 2b                      |
| <i>DTX1</i>   | rs1732793   | 12   | intron   | 8.16E-05 | 0.014             | TFBS                 | 3a                      |
| <i>DTX1</i>   | rs3217697   | 12   | intron   | 8.04E-05 | 0.014             | -                    | 3a                      |
| <i>TLE1</i>   | rs141894076 | 9    | intron   | 2.14E-04 | 6.99E-05          | -                    | 5                       |
| <i>TLE1</i>   | rs199731120 | 9    | intron   | 3.47E-04 | 6.52E-04          | -                    | 3b                      |
| <i>TLE1</i>   | rs35970494  | 9    | intron   | 3.38E-04 | 0.012             | -                    | 6                       |
| <i>TLE1</i>   | rs72747302  | 9    | intron   | 3.58E-04 | 6.99E-05          | -                    | 4                       |
| <i>E2F3</i>   | rs3806116   | 6    | intron   | 2.56E-04 | 0.046             | -                    | -                       |

Abbreviations: SNPs, single nucleotide polymorphisms; Chr., chromosome; eQTL, expression quantitative trait loci; TFBS, transcription factor binding sites.

<sup>a</sup>Multivariate Cox regression analyses were adjusted for age, sex, smoking status, histology, tumor stage, chemotherapy, radiotherapy, and surgery.

<sup>b</sup>eQTL results in additive model of genotypes in 373 individuals of European descendants from 1000 Genomes Project.

<sup>c</sup><http://snpinfo.niehs.nih.gov/snpinfo/snpfunc.htm>.

<sup>d</sup><http://regulome.stanford.edu/>.



**Supplementary Table S4: Stratified association analyses of risk genotypes and OS in NSCLC patients from the PLCO study**

| Characteristics         | 0–1 risk genotype <sup>a</sup> |            | 2–5 risk genotypes <sup>a</sup> |            | Univariate analysis |          | Multivariate analysis <sup>b</sup> |          | <i>P</i> <sub>heterogeneity<sup>c</sup></sub> |
|-------------------------|--------------------------------|------------|---------------------------------|------------|---------------------|----------|------------------------------------|----------|-----------------------------------------------|
|                         | All                            | Death (%)  | All                             | Death (%)  | HR (95%CI)          | <i>P</i> | HR (95%CI)                         | <i>P</i> |                                               |
| <b>Age (years)</b>      |                                |            |                                 |            |                     |          |                                    |          |                                               |
| ≤ 71                    | 233                            | 128 (54.9) | 373                             | 251 (67.3) | 1.38 (1.12–1.71)    | 0.003    | 1.46 (1.17–1.81)                   | 0.001    |                                               |
| > 71                    | 220                            | 151 (68.6) | 299                             | 221 (73.9) | 1.21 (0.98–1.49)    | 0.075    | 1.60 (1.29–1.98)                   | 2.08E-05 | 0.557                                         |
| <b>Sex</b>              |                                |            |                                 |            |                     |          |                                    |          |                                               |
| Male                    | 270                            | 174 (64.4) | 384                             | 295 (76.8) | 1.36 (1.12–1.64)    | 0.002    | 1.54 (1.27–1.87)                   | 1.59E-05 |                                               |
| Female                  | 183                            | 105 (57.4) | 288                             | 177 (61.5) | 1.16 (0.91–1.48)    | 0.230    | 1.68 (1.30–2.17)                   | 7.81E-05 | 0.595                                         |
| <b>Smoking status</b>   |                                |            |                                 |            |                     |          |                                    |          |                                               |
| Never                   | 39                             | 21 (53.9)  | 66                              | 36 (54.6)  | 1.09 (0.63–1.86)    | 0.767    | 1.34 (0.75–2.40)                   | 0.322    |                                               |
| Current                 | 168                            | 96 (57.1)  | 230                             | 157 (68.3) | 1.38 (1.07–1.79)    | 0.013    | 1.37 (1.04–1.79)                   | 0.023    |                                               |
| Former                  | 246                            | 162 (65.9) | 376                             | 279 (74.2) | 1.23 (1.01–1.49)    | 0.037    | 1.72 (1.40–2.10)                   | 1.61E-07 | 0.362                                         |
| <b>Histology</b>        |                                |            |                                 |            |                     |          |                                    |          |                                               |
| Adenocarcinoma          | 230                            | 133 (57.8) | 314                             | 192 (61.2) | 1.11 (0.89–1.39)    | 0.354    | 1.65 (1.31–2.08)                   | 2.63E-05 |                                               |
| Squamous cell carcinoma | 110                            | 66 (60.0)  | 165                             | 118 (71.5) | 1.22 (0.91–1.66)    | 0.189    | 1.55 (1.13–2.13)                   | 0.007    |                                               |
| others                  | 113                            | 80 (70.8)  | 193                             | 162 (83.9) | 1.55 (1.18–2.02)    | 0.002    | 1.57 (1.19–2.08)                   | 0.001    | 0.940                                         |
| <b>Tumor stage</b>      |                                |            |                                 |            |                     |          |                                    |          |                                               |
| I-III A                 | 247                            | 101 (40.9) | 381                             | 199 (52.2) | 1.42 (1.12–1.81)    | 0.004    | 1.30 (1.02–1.66)                   | 0.035    |                                               |
| IIIB-IV                 | 206                            | 178 (86.4) | 289                             | 272 (94.1) | 1.44 (1.19–1.74)    | 1.96E-04 | 1.55 (1.27–1.90)                   | 1.47E-05 | 0.275                                         |
| <b>Chemotherapy</b>     |                                |            |                                 |            |                     |          |                                    |          |                                               |
| No                      | 250                            | 119 (47.6) | 354                             | 223 (60.5) | 1.49 (1.19–1.86)    | 4.54E-04 | 1.66 (1.31–2.09)                   | 1.99E-05 |                                               |
| Yes                     | 199                            | 156 (78.4) | 314                             | 245 (78.0) | 1.07 (0.88–1.31)    | 0.511    | 1.38 (1.12–1.70)                   | 0.002    | 0.248                                         |
| <b>Radiotherapy</b>     |                                |            |                                 |            |                     |          |                                    |          |                                               |
| No                      | 293                            | 151 (51.5) | 434                             | 275 (63.4) | 1.39 (1.14–1.69)    | 0.001    | 1.45 (1.19–1.78)                   | 2.86E-04 |                                               |
| Yes                     | 156                            | 124 (79.5) | 234                             | 193 (82.5) | 1.12 (0.90–1.41)    | 0.318    | 1.74 (1.36–2.22)                   | 8.78E-06 | 0.260                                         |
| <b>Surgery</b>          |                                |            |                                 |            |                     |          |                                    |          |                                               |
| No                      | 236                            | 204 (86.4) | 361                             | 325 (90.0) | 1.25 (1.05–1.49)    | 0.014    | 1.43 (1.19–1.71)                   | 1.49E-04 |                                               |
| Yes                     | 213                            | 71 (33.3)  | 307                             | 143 (46.6) | 1.57 (1.18–2.09)    | 0.002    | 1.75 (1.31–2.35)                   | 1.82E-04 | 0.250                                         |

Abbreviations: OS, overall survival; NSCLC, non-small cell lung cancer; PLCO, the Prostate, Lung, Colorectal and Ovarian Cancer Screening Trial; HR, hazards ratio.

<sup>a</sup>Risk genotypes included rs10794069 AG+GG, rs1732793 GA+AA, rs199731120 C/CA+CA/CA, rs35970494 T/TC+TC/TC, rs3806116 GT+TT.

<sup>b</sup>Adjusted by age, sex, smoking status, histology, tumor stage, chemotherapy, radiotherapy, and surgery when appropriate.

<sup>c</sup>*P* for heterogeneity in multivariate analyses.
